# Supplementary material for: Antitumor Activity of NVP-BKM120—A Selective Pan Class I PI3 Kinase Inhibitor Showed Differential Forms of Cell Death Based on p53 Status of Glioma Cells
Source: Oxford University Press journal article supplement (doi:10.1158/1078-0432.ccr-11-1558), 2011-11-08
Supplement: 10780432ccr111558-sup-ccr_11-1558_meth_f1_pdf_622k.pdf [file 10780432ccr111558-sup-ccr_11-1558_meth_f1_pdf_622k.pdf]

## Supplementary Methods.

### **NVP-BKM120 has anti-proliferative activity irrespective of PTEN status. (A)**

Glioma cells expressing either wild type PTEN (LN18, LN229,U87-PTEN) or mutated PTEN (U251 and U87) were assessed for cell viability in presence of NVP-BKM120 for 72hrs using CTB assay. In panel B, the immunoblot shows molecular response of glioma cells with PTEN and without PTEN to NVP-BKM120 to PI3 mediated signaling.

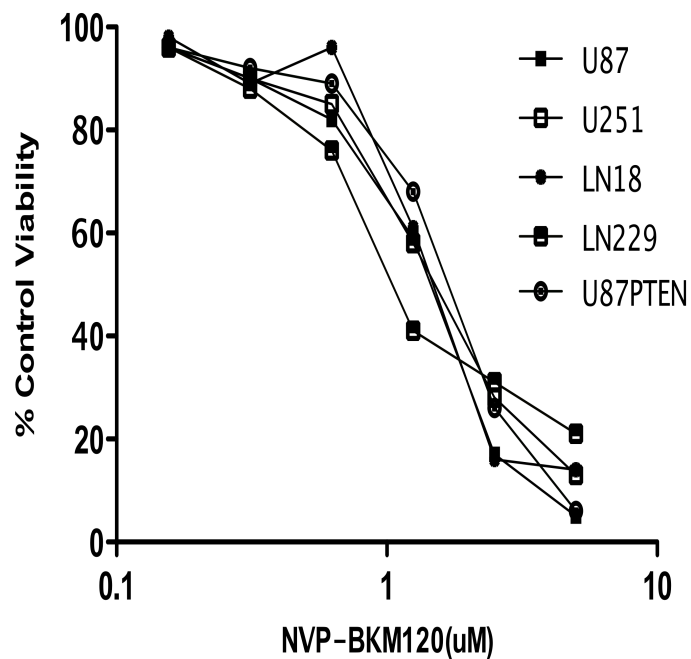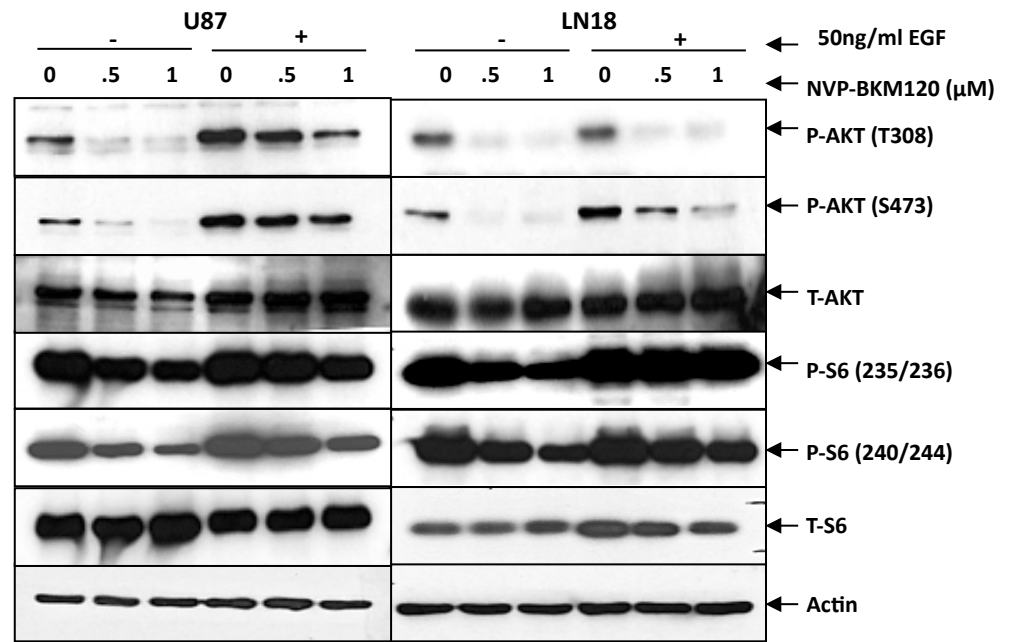

**NVP-BKM120 has anti-proliferative activity irrespective of PTEN status.** (A) Glioma cells expressing either wild type PTEN (LN18, LN229, U87-PTEN) or mutated PTEN (U251 and U87) were assessed for cell viability in presence of NVP-BKM120 for 72hrs using CTB assay. In panel B, the immunoblot shows molecular response of glioma cells with PTEN and without PTEN to NVP-BKM120 to PI3 mediated signaling.
